# Supplementary material for: Unique Pathogen Peptidomes Facilitate Pathogen-Specific Selection and Specialization of MHC Alleles
Source: PubMed Central journal article supplement (PMC8476153; doi:10.1093/molbev/msab176), 2021-06-10
Supplement: msab176_supplementary_data.pdf [file msab176_supplementary_data.pdf]

1 **Supplementary Material for**

2

3 Unique pathogen peptidomes facilitate pathogen-specific selection and

4 specialization of MHC alleles

5

6 Onur Özer<sup>1,2</sup> & Tobias L. Lenz<sup>1,2,\*</sup>

7

8 Affiliations:

9 <sup>1</sup> Research Group for Evolutionary Immunogenomics, Max Planck Institute for

10 Evolutionary Biology, 24306 Plön, Germany

11

12 <sup>2</sup> Research Unit for Evolutionary Immunogenomics, Department of Biology, Universität

13 Hamburg, 20146 Hamburg, Germany

14

15 \* Corresponding author: Tobias L Lenz (lenz@post.harvard.edu)

16

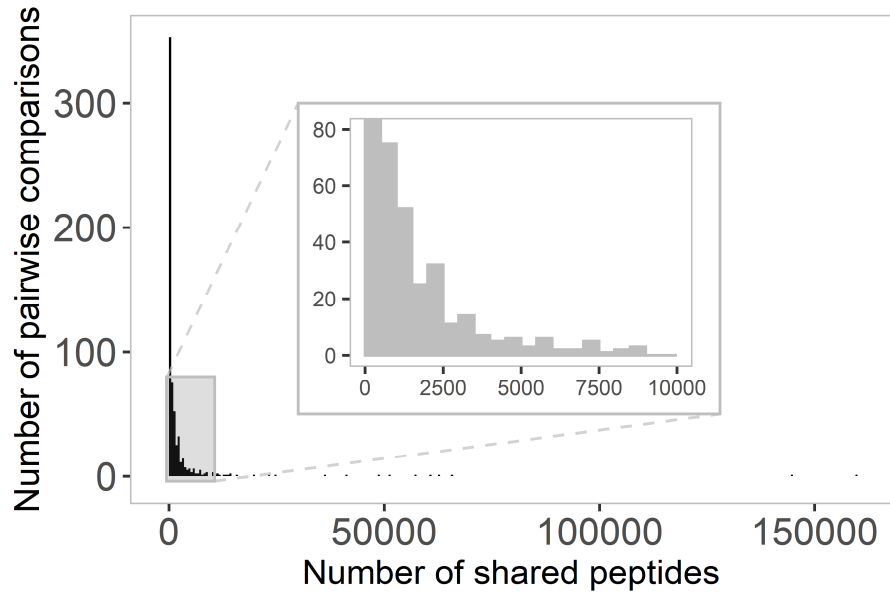

17

18 **Figure S1.** Distribution of the number of shared peptides among all pairs of pathogens  
 19 (N=630). For each pathogen pair, shared peptides represent the overlap between both  
 20 pathogen peptidomes.

21

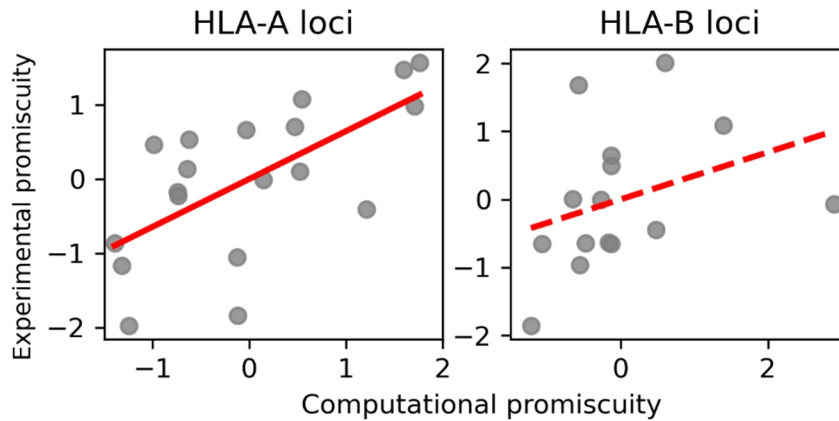

22

23 **Figure S2.** Experimental and computational promiscuity values are correlated for HLA-  
 24 A (Kendall's tau = 0.51, p = 0.002) and HLA-B (Kendall's tau = 0.37, p = 0.054) loci.

25 Each dot represents HLA-A (N = 19) and HLA-B (N = 15) variants for which sufficient  
 26 experimental data is available on the Immune Epitope Database. Computational

27 promiscuity was calculated as the fraction of the bound peptides among the complete

28 dataset of 51.9 Mio peptides. Experimental promiscuity was calculated based on the data

29 from the Immune Epitope Database as the fraction of positive binding assays among the

30 total number of assays for each HLA allele. Computational and experimental promiscuity

31 values were normalized for comparison. Solid red line represents significant correlation

32 while dashed line represents positive trend. The HLA alleles included in the analysis are

33 A\*01:01, A\*02:01, A\*02:02, A\*02:03, A\*02:06, A\*03:01, A\*11:01, A\*23:01, A\*24:02,

34 A\*24:03, A\*26:01, A\*30:01, A\*30:02, A\*31:01, A\*33:01, A\*68:01, A\*68:02, A\*69:01,

35 A\*80:01, B\*07:02, B\*08:01, B\*15:01, B\*15:17, B\*18:01, B\*27:05, B\*35:01, B\*39:01,

36 B\*40:01, B\*44:02, B\*46:01, B\*51:01, B\*53:01, B\*57:01, B\*58:01.

37

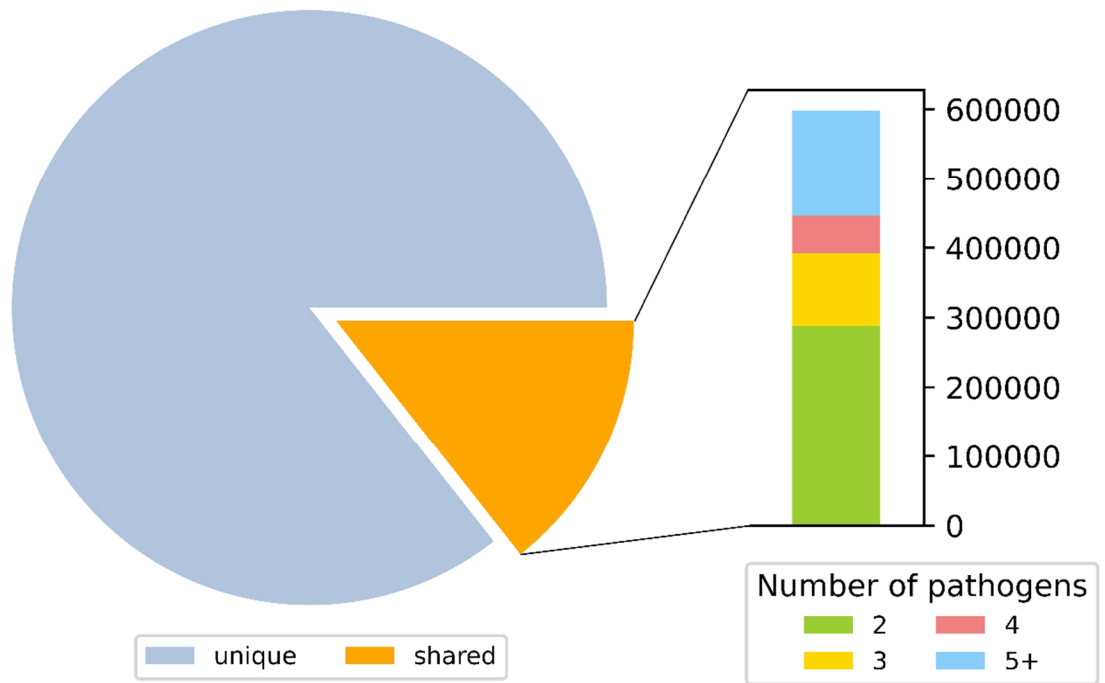

38

39 **Figure S3.** Peptide sharing among human pathogens based on groups of peptides that are  
 40 bound by same set of HLA alleles. A total of 4,157,475 groups were analyzed and only  
 41 14.4% of these groups were shared among pathogens. The pie chart represents the  
 42 proportions of shared (N = 597,700) and unique (N = 3,559,775) groups of peptides while  
 43 the bar chart shows the extent of sharing across pathogen species for all shared peptide  
 44 groups.

45

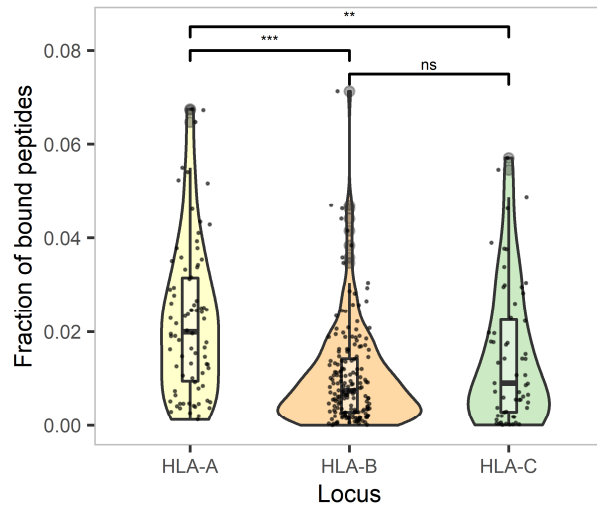

46

47 **Figure S4.** Variation of promiscuity within and among MHC loci. The fraction of bound  
 48 peptides out of the complete set of unique peptides ( $N = 51,861,826$  nine-mers) is shown  
 49 for common variants of the three HLA class I loci (HLA-A;  $n = 82$ , HLA-B;  $n = 180$  and  
 50 HLA-C;  $n = 59$ ). Each dot represents an HLA variant. Upper and lower edges of boxes  
 51 correspond to the first and the third quartiles of the data while whiskers extend up to the  
 52 data at most 1.5 IQR away from the edges of the box. Statistical significance from  
 53 Wilcoxon rank sum test is indicated: \*\*\* -  $p < 0.001$ , \*\* -  $p < 0.01$ , ns -  $p > 0.05$ .

54

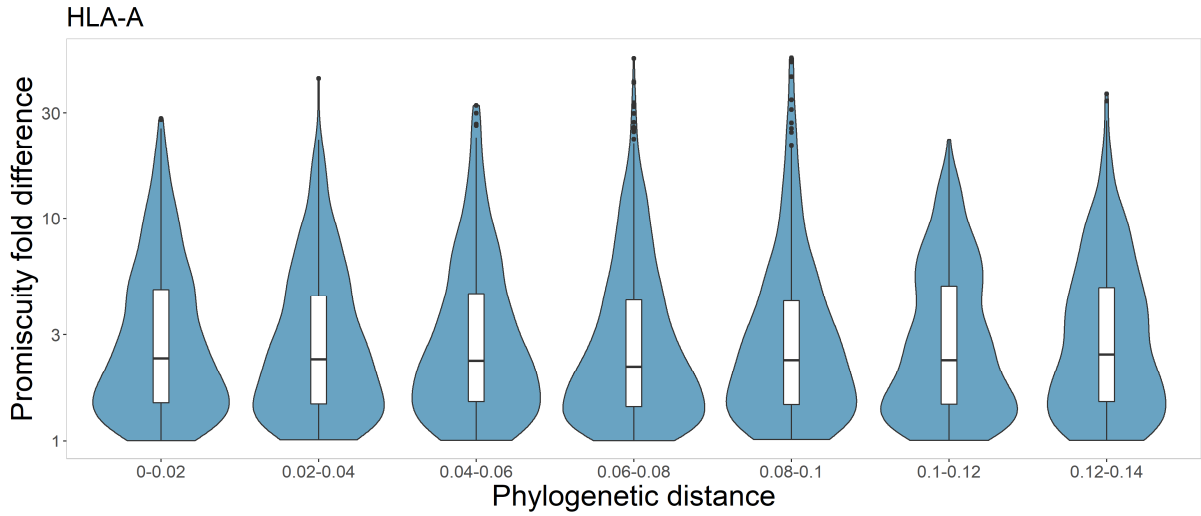

55

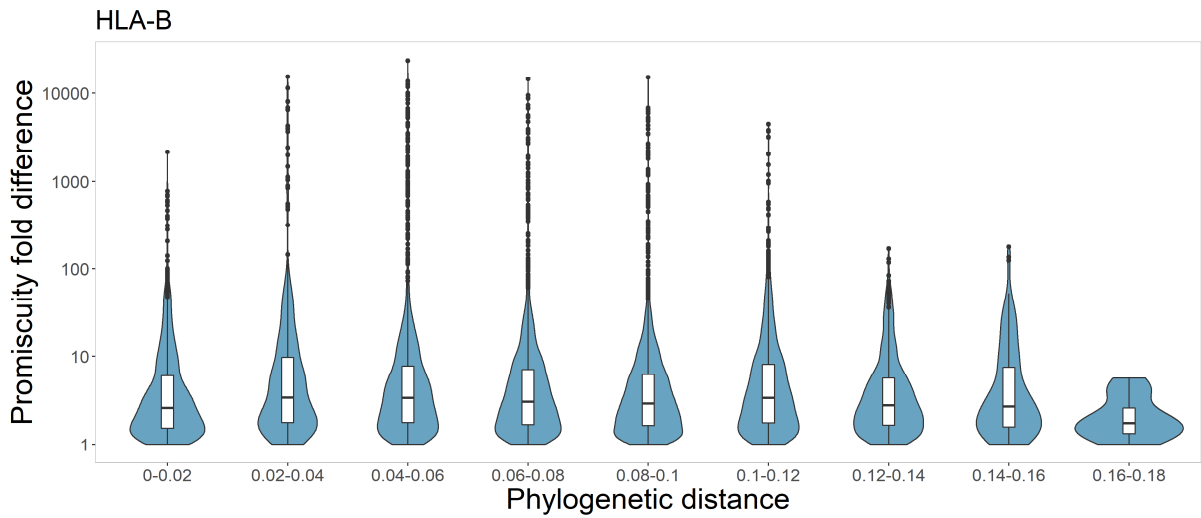

56

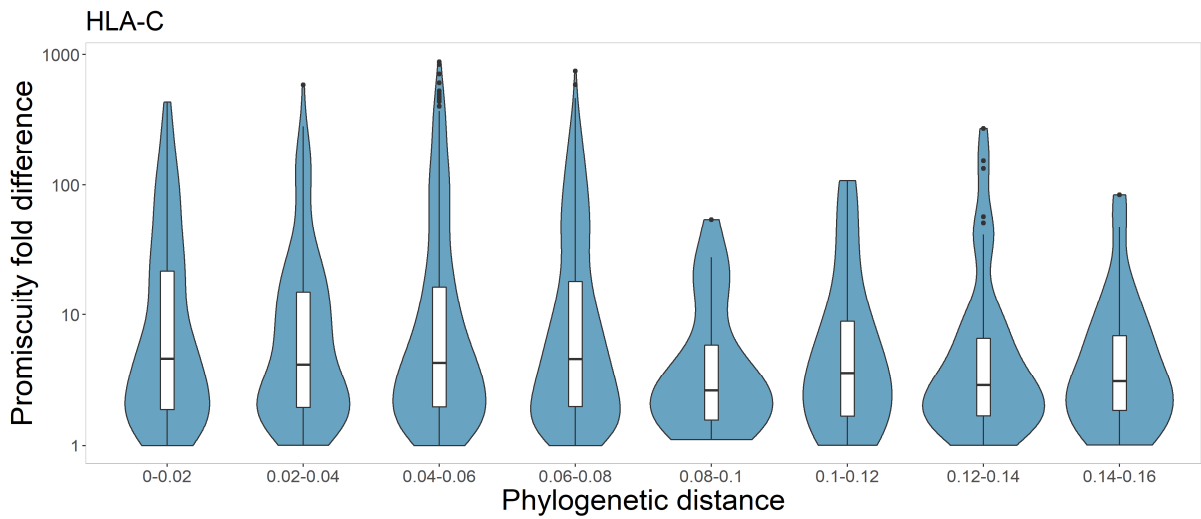

57

58 **Figure S5.** Differences in promiscuity in comparison to phylogenetic distance between  
 59 pairs of HLA variants (HLA-A; n = 82, HLA-B; n = 180 and HLA-C; n = 59).

60 Phylogenetic distance between each pair is calculated as tip-to-tip distance in a  
61 phylogenetic tree. Promiscuity differences were calculated for each pair as the ratio of the  
62 number of bound peptides of more promiscuous variant to the number of bound peptides  
63 of the less promiscuous variant. Variant pairs were binned based on phylogenetic  
64 distance for better visualization.  
65

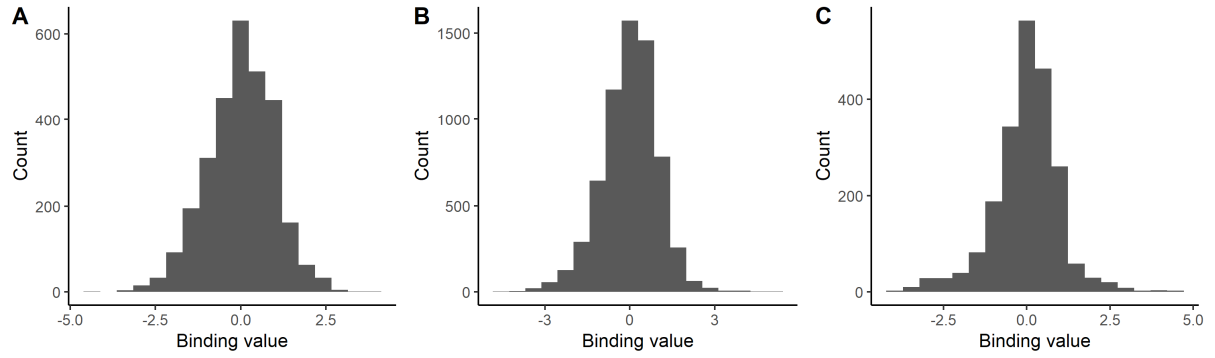

66

67 **Figure S6.** Distribution of standardized binding proportions for (A) HLA-A (n = 82), (B)  
 68 HLA-B (n = 180) and (C) HLA-C (n = 59) loci. The fraction of bound peptides from each  
 69 pathogen was normalized for each allele to obtain binding values (i.e. standardized  
 70 binding proportions).

71



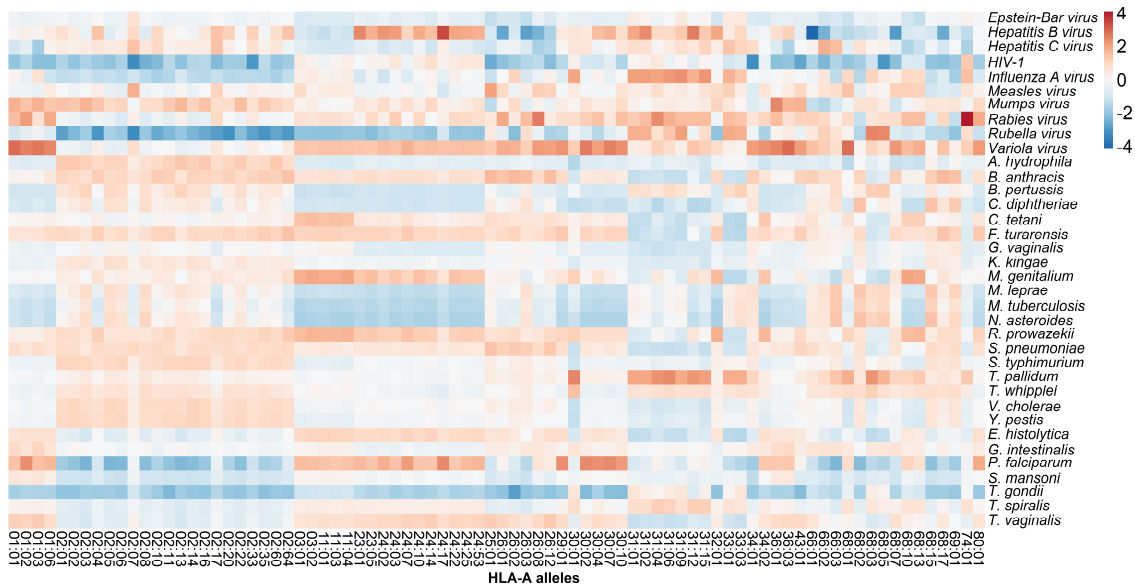

72

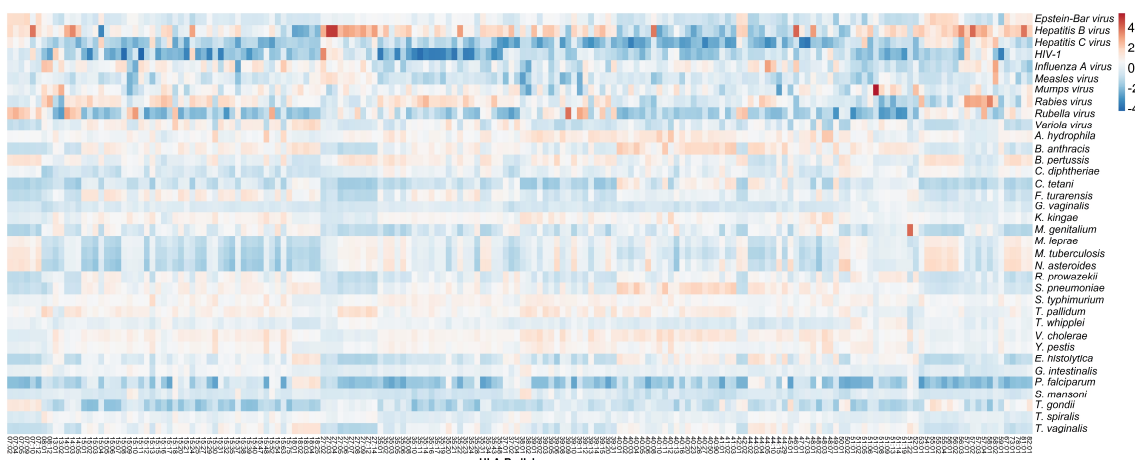

73

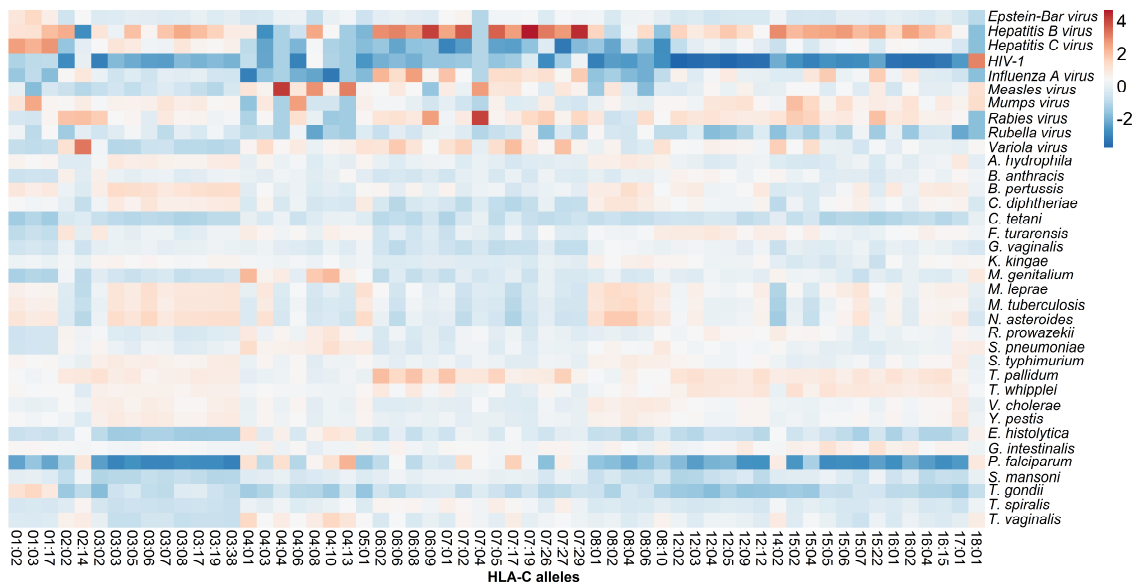

74

75 **Figure S7.** Standardized proportions of bound peptides by each HLA variant (x-axis)  
76 (HLA-A: n = 82; HLA-B: n = 180; HLA-C: n = 59) from each pathogen (y-axis)(n = 36).  
77 Corresponding HLA locus of each heatmap is written on the x-axis label.  
78

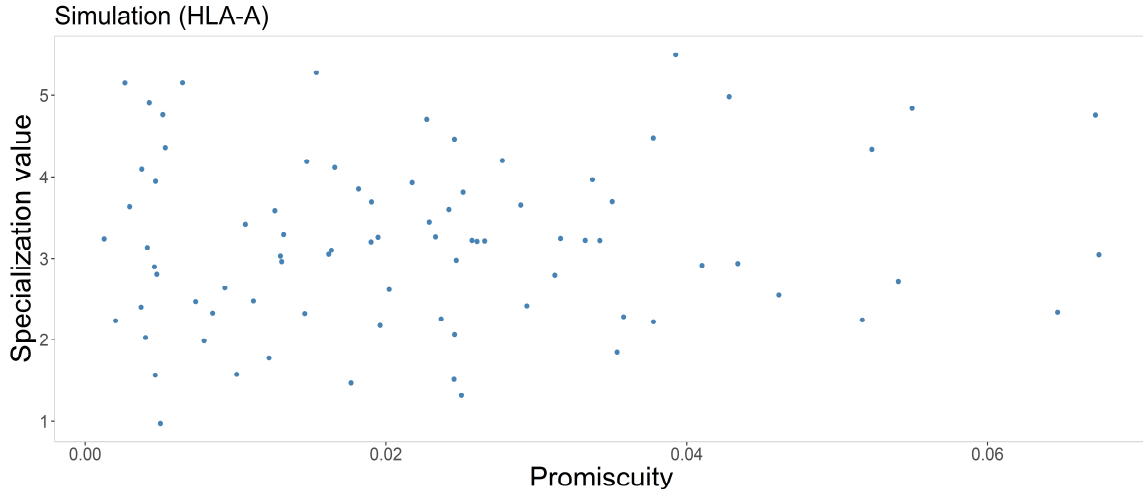

79

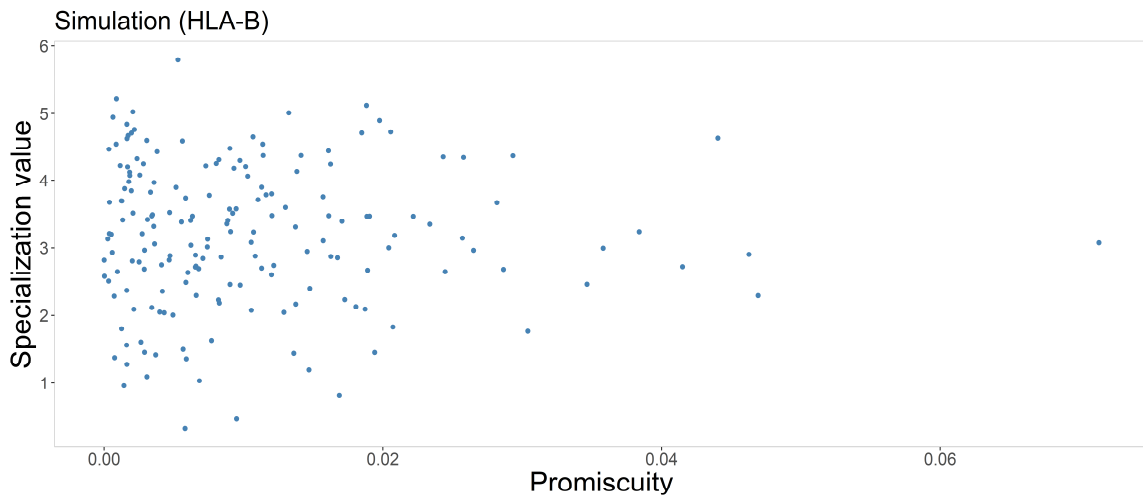

80

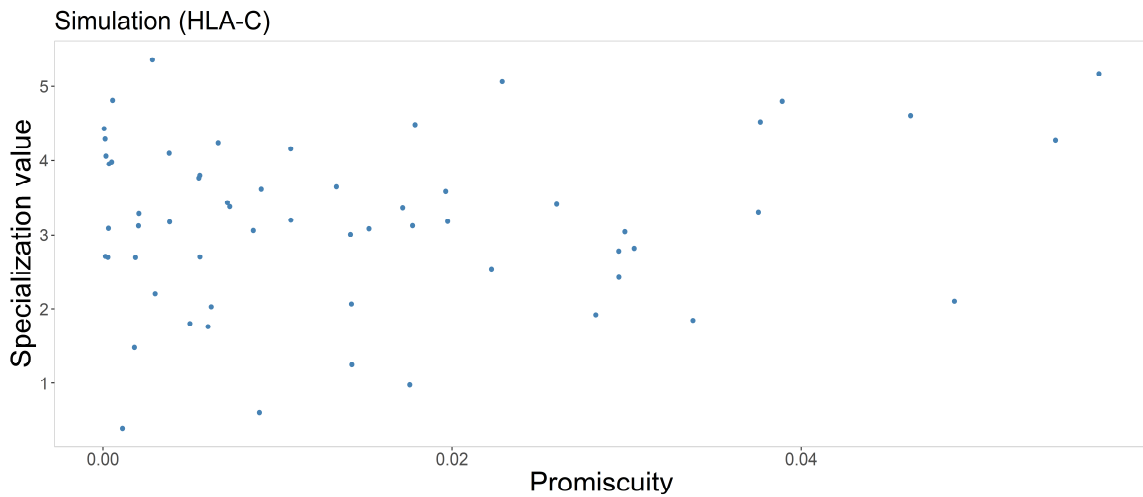

81

82 **Figure S8.** Specialization as a function of promiscuity in the simulated data. Each dot  
 83 corresponds to a simulated HLA variant. The number of bound peptides by each HLA  
 84 variant from each pathogen were simulated by using the observed promiscuity of an HLA

85 variant as the probability of binding a peptide. Specialization value of simulated HLA  
86 variants were calculated in the same way as the real data (i.e. difference between the  
87 maximum and the median values of standardized proportions of bound peptides). No  
88 significant correlation between specialization and promiscuity were observed for any  
89 locus in the simulated data (Kendall correlation, HLA-A:  $\tau = 0.05$   $p = 0.54$ ; HLA-B:  
90  $\tau = -0.02$   $p = 0.65$ ; HLA-C:  $\tau = 0.01$   $p = 0.93$ ).  
91

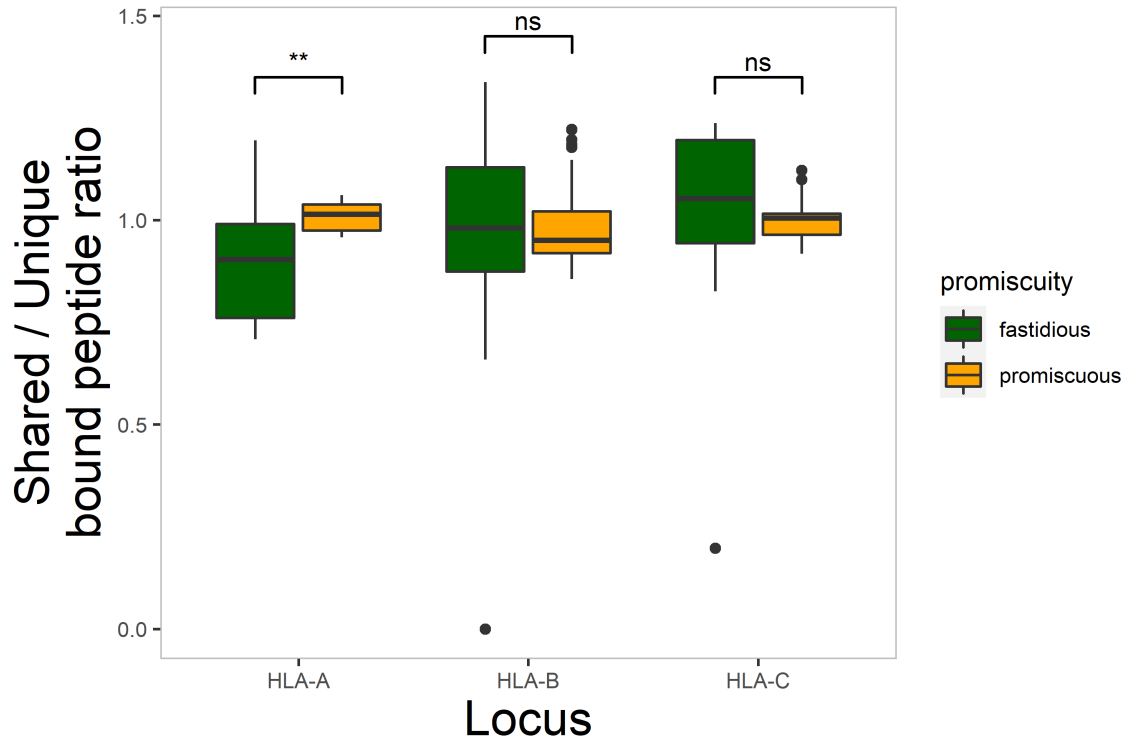

92

93 **Figure S9.** Comparison of the most promiscuous (top 25%) and the most fastidious  
 94 (bottom 25%) HLA variants regarding binding to shared peptides. Shared peptides are the  
 95 peptides observed in at least three different pathogens. The ratio on the y-axis is expected  
 96 to be one if there is no tendency of alleles to bind either shared or unique peptides. \*\* -  
 97  $p < 0.01$ , ns -  $p > 0.05$  (Wilcoxon rank sum test)

98

99  
100

**Table S1.** Human pathogens used for the analysis. The asterisk (\*) indicates that the pathogen is used for the pairwise peptide sharing analysis in Figure 2.

| Organism                               | UniProt Proteome ID | Date accessed | Number of proteins | Number of nine-mers |
|----------------------------------------|---------------------|---------------|--------------------|---------------------|
| <i>Aeromonas hydrophila</i>            | UP000000756         | 11.08.2018    | 4121               | 1330710             |
| <i>Bacillus anthracis</i> (*)          | UP000000594         | 11.12.2018    | 5490               | 1375030             |
| <i>Bordetella pertussis</i> (*)        | UP000002676         | 3.07.2018     | 3258               | 1013488             |
| <i>Clostridium tetani</i> (*)          | UP000001412         | 3.07.2018     | 2415               | 780947              |
| <i>Corynebacterium diphtheriae</i> (*) | UP000002198         | 3.07.2018     | 2265               | 701220              |
| <i>Entamoeba histolytica</i>           | UP000001926         | 3.07.2018     | 7959               | 2972321             |
| Epstein-Barr virus                     | UP000153037         | 3.07.2018     | 92                 | 39553               |
| <i>Francisella tularensis</i>          | UP000001174         | 11.08.2018    | 1528               | 459802              |
| <i>Gardnerella vaginalis</i>           | UP000001453         | 11.08.2018    | 1365               | 470742              |
| <i>Giardia intestinalis</i> (*)        | UP000001548         | 3.07.2018     | 7154               | 3048781             |
| Hepatitis B virus                      | UP000007930         | 3.07.2018     | 7                  | 1760                |
| Hepatitis C virus                      | UP000000518         | 3.07.2018     | 2                  | 3154                |
| HIV1                                   | UP000002241         | 11.12.2018    | 9                  | 3062                |
| Influenza A virus                      | UP000009255         | 3.07.2018     | 13                 | 4508                |
| <i>Kingella kingae</i>                 | UP000004207         | 11.08.2018    | 2102               | 551780              |
| Measles virus                          | UP000008699         | 3.07.2018     | 8                  | 4907                |
| Mumps virus                            | UP000002331         | 11.12.2018    | 8                  | 4759                |
| <i>Mycobacterium leprae</i> (*)        | UP000000806         | 11.12.2018    | 1603               | 521894              |
| <i>Mycobacterium tuberculosis</i> (*)  | UP000001584         | 12.06.2018    | 3993               | 1263777             |
| <i>Mycoplasma genitalium</i> (*)       | UP000000807         | 11.12.2018    | 483                | 172194              |
| <i>Nocardia asteroides</i>             | UP0000017048        | 11.08.2018    | 6459               | 2018795             |
| <i>Plasmodium falciparum</i> (*)       | UP000001450         | 16.06.2018    | 5449               | 3806032             |
| Rabies virus                           | UP000008649         | 3.07.2018     | 5                  | 3570                |
| <i>Rickettsia prowazekii</i> (*)       | UP000002480         | 11.08.2018    | 834                | 271251              |
| Rubella virus                          | UP000000571         | 3.07.2018     | 2                  | 3162                |
| <i>Salmonella typhimurium</i> (*)      | UP000001014         | 11.08.2018    | 4431               | 1341710             |
| <i>Schistosoma mansoni</i>             | UP000008854         | 3.07.2018     | 11723              | 4939504             |
| <i>Streptococcus pneumoniae</i> (*)    | UP000002642         | 2.07.2018     | 2823               | 541479              |
| <i>Toxoplasma gondii</i>               | UP000002226         | 3.07.2018     | 8404               | 6440952             |
| <i>Treponema pallidum</i> (*)          | UP000000811         | 11.08.2018    | 1027               | 337608              |
| <i>Trichinella spiralis</i>            | UP000006823         | 3.07.2018     | 16041              | 4319328             |
| <i>Trichomonas vaginalis</i>           | UP000001542         | 3.07.2018     | 50190              | 11405499            |
| <i>Tropheryma whpplei</i>              | UP000002200         | 11.08.2018    | 805                | 251906              |
| Variola virus                          | UP000002060         | 3.07.2018     | 199                | 52593               |
| <i>Vibrio cholera</i> (*)              | UP000000584         | 2.07.2018     | 3783               | 1110752             |
| <i>Yersinia pestis</i> (*)             | UP000000815         | 3.07.2018     | 3909               | 1193604             |

101
